# Supplementary material
Source: ML conference proceedings conference paper supplement (https://openreview.net/forum?id=fSmoBjDb2W)
Supplement: supplementary_material [file attachment]

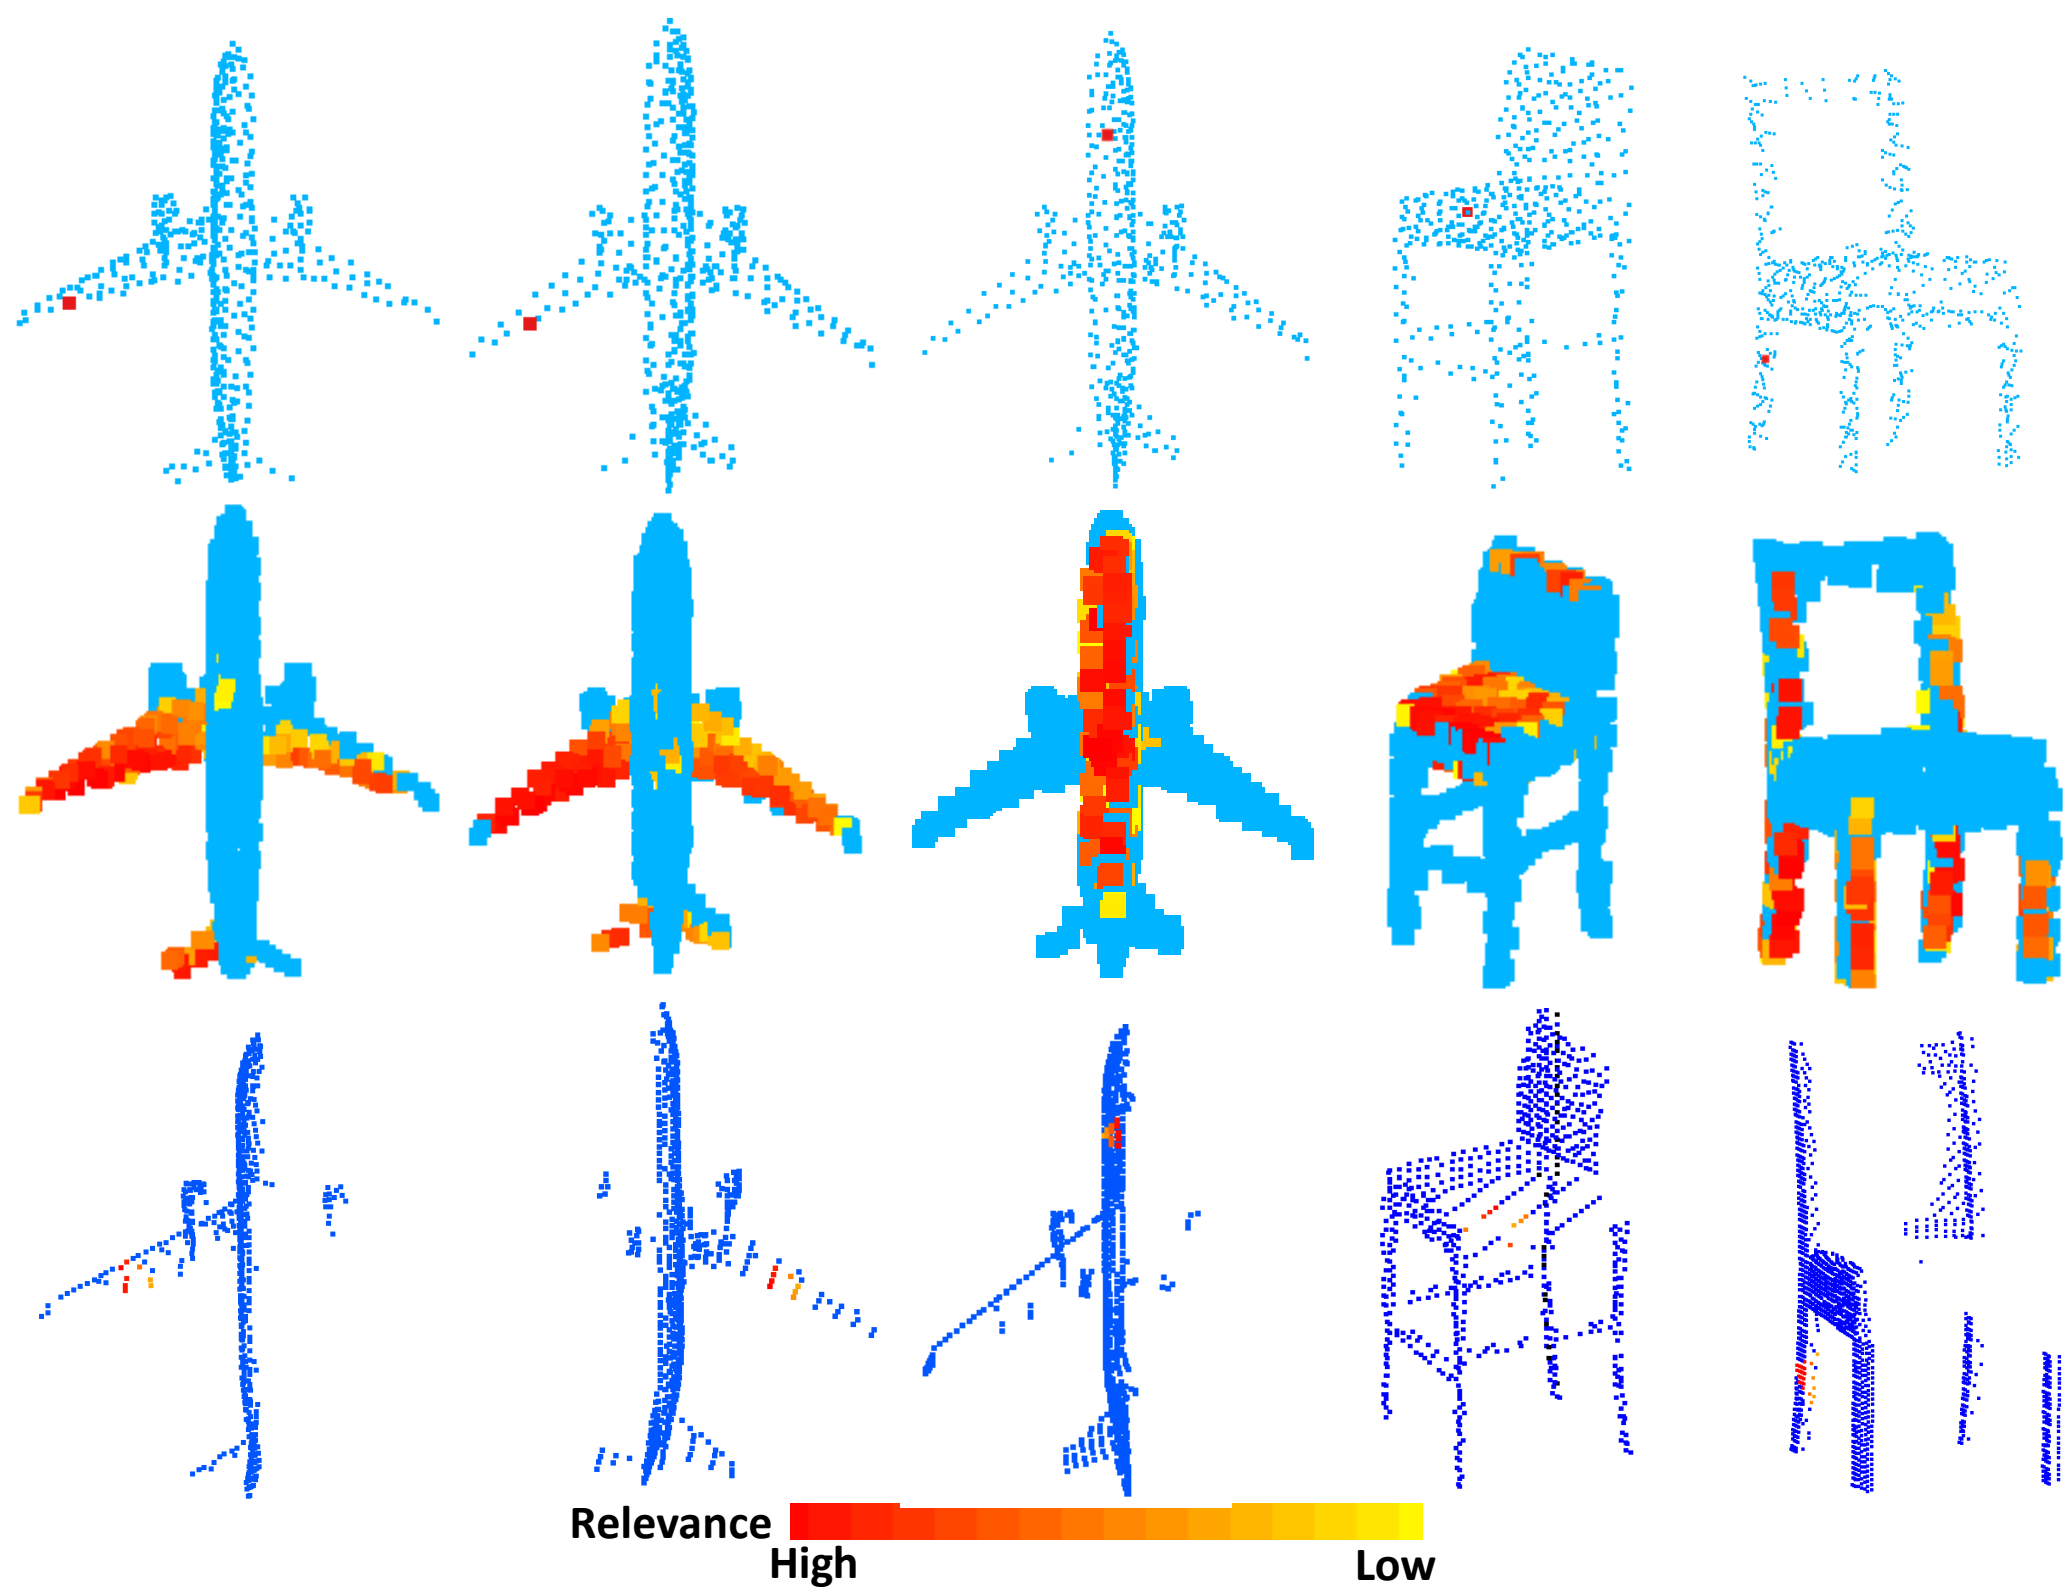

Figure 1 : Experimental results of semantic recovery module and interest region prompt module.



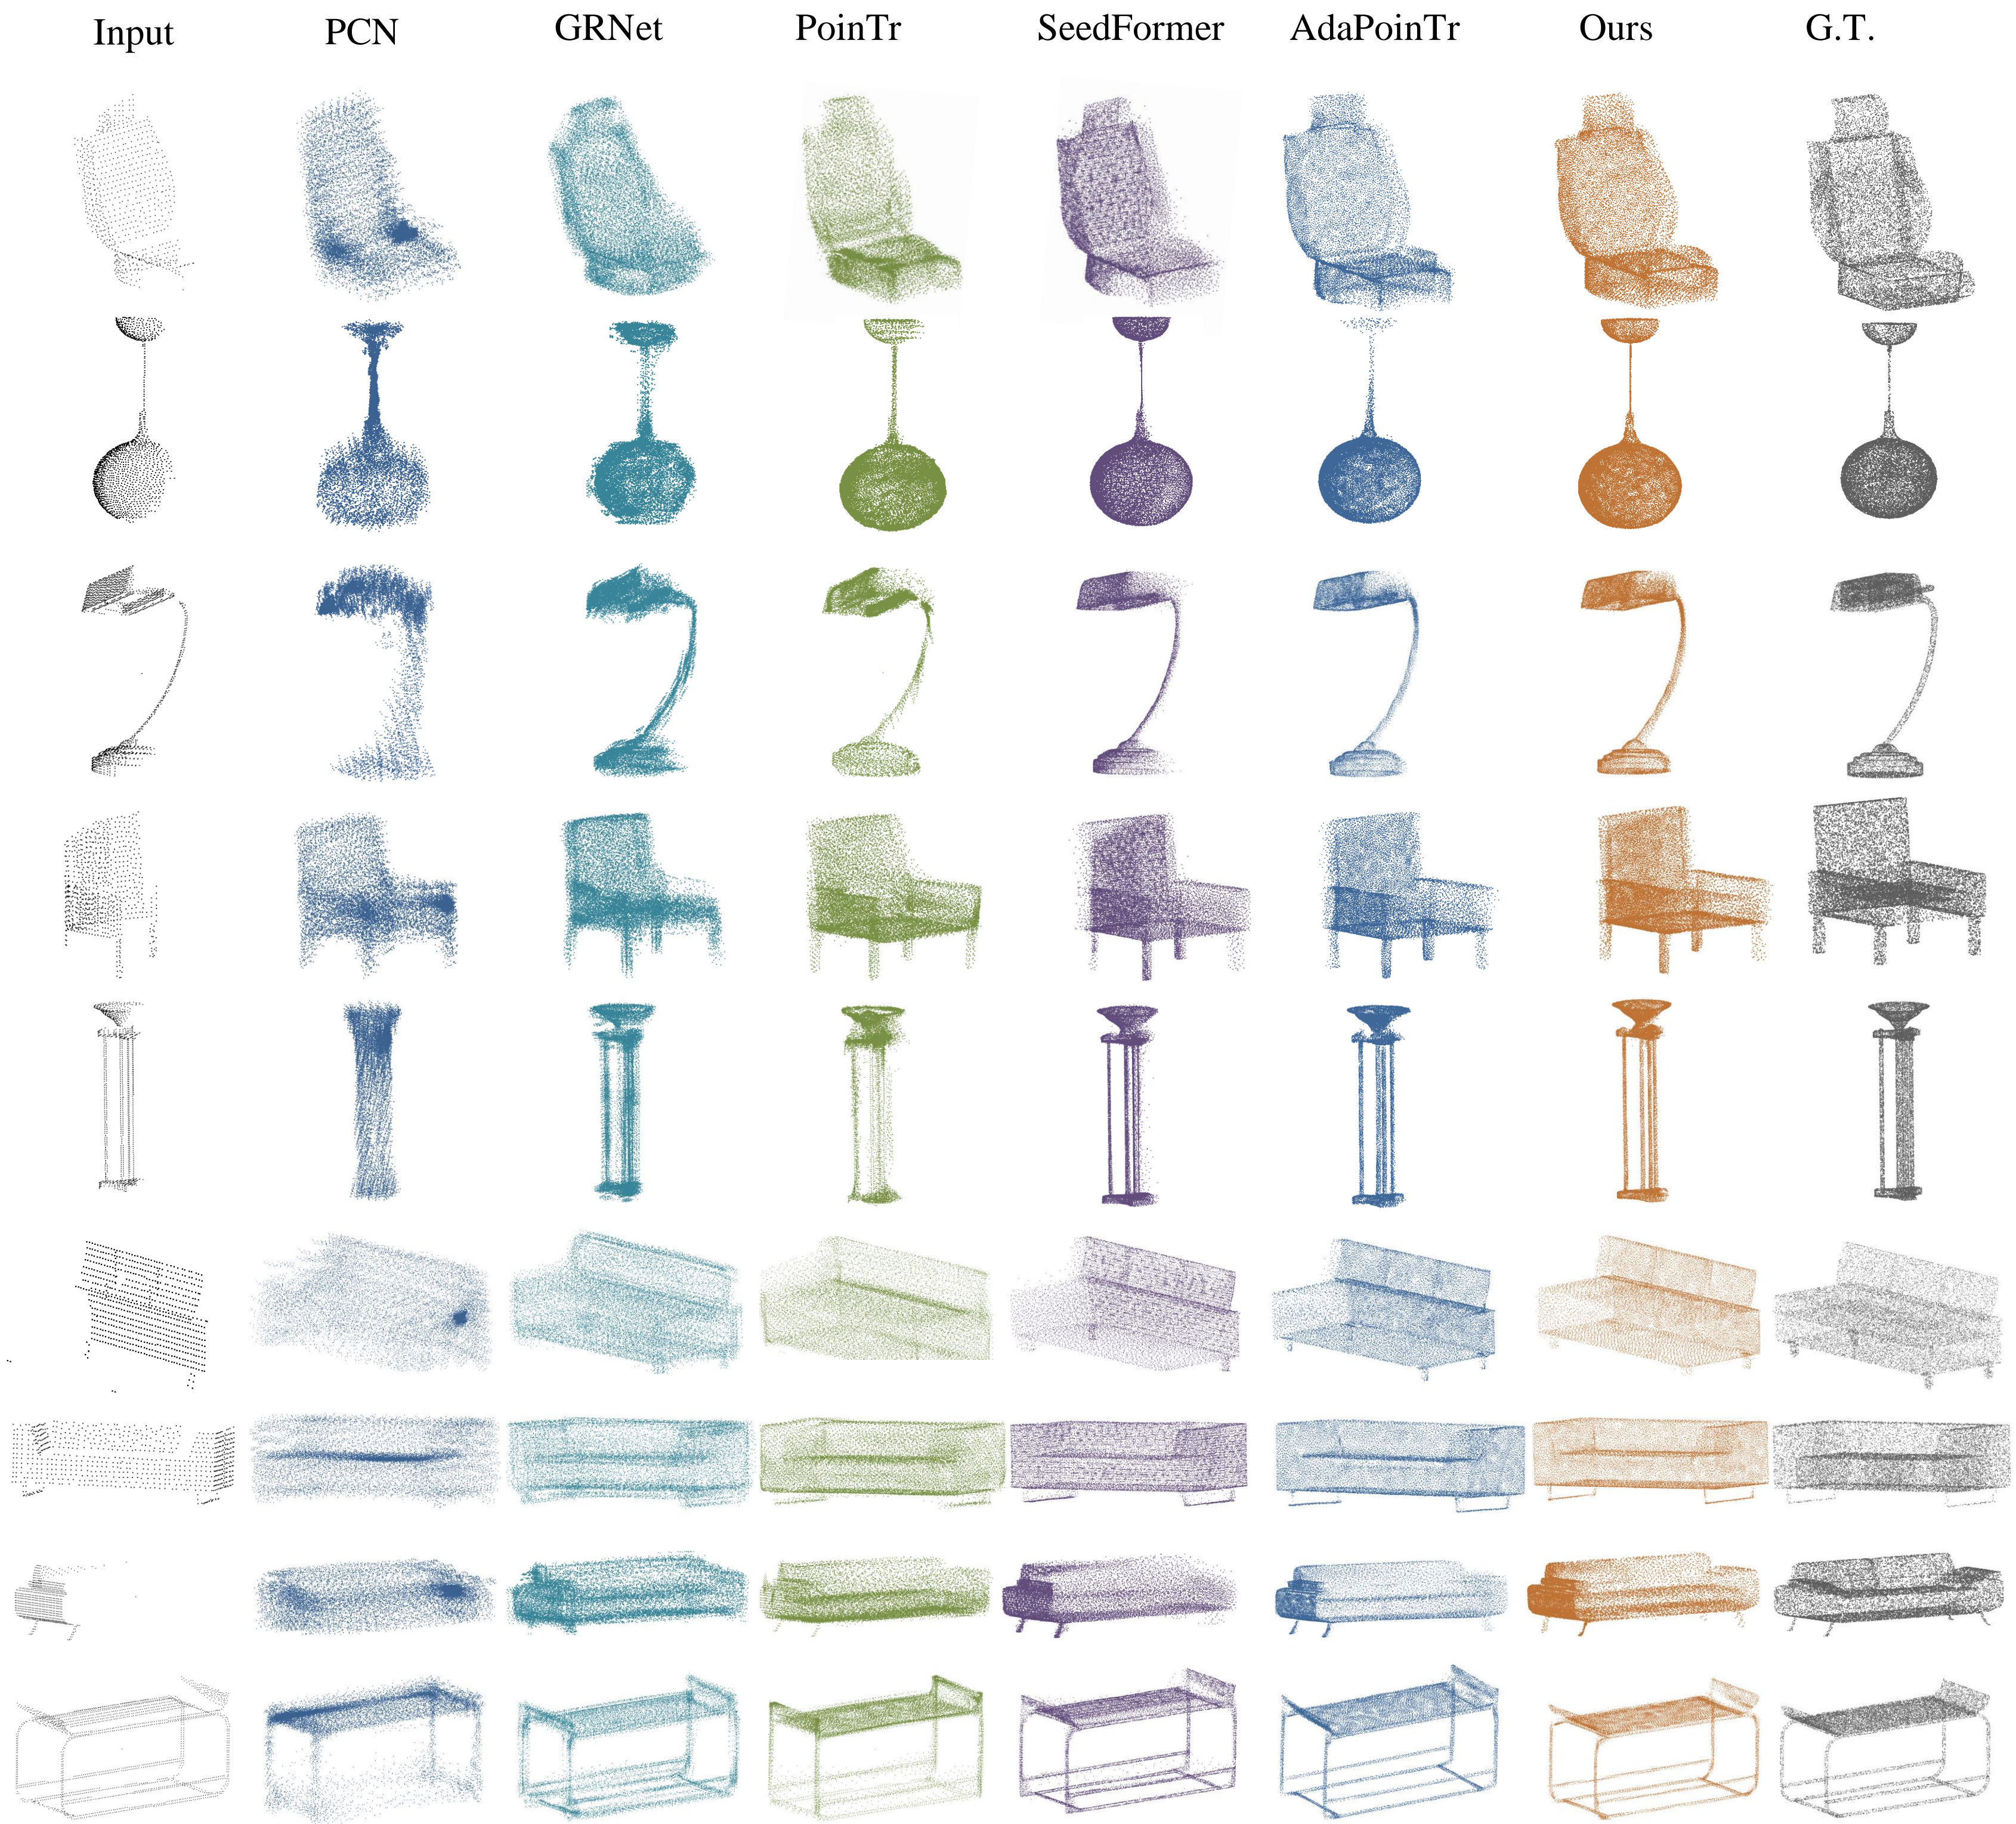

**Figure 2 : Experimental Result. More PCN dataset results comparison visualizations**
